# Supplementary material for: Domain-Generality of Timing-Based Serial Order Processes in Short-Term Memory: New Insights from Musical and Verbal Domains
Source: PLoS One. 2016 Dec 19;11(12):e0168699. doi: 10.1371/journal.pone.0168699 (PMC5167417; doi:10.1371/journal.pone.0168699)
Supplement: S2 Data — The rows in orange correspond to the participants with outlier RL and the row in yellow corresponds to the participant with outlier recognition accuracy, as described in the manuscript (VNI = verbal no-interference item; VAI = verbal articulatory suppression item; VRI = verbal rhythmic interference item; VNO = verbal no-interference order; VAO = verbal articulatory suppression order; VRO = verbal rhythmic interference order; MNI = musical no-interference item; MAI = musical articulatory suppression item; MRI = musical rhythmic interference item; MNO = musical no-interference order; MAO = musical articulatory suppression order; MRO = musical rhythmic interference order). (XLSX) [file pone.0168699.s002.xlsx]

## Sheet: RL_XP1
	Experimental conditions
Participants	VNI	VAI	VRI	VNO	VAO	VRO	MNI	MAI	MRI	MNO	MAO	MRO
S1	424	589	929	358	361	354	798	522	825	432	605	472
S2	353	519	418	394	337	356	308	361	442	997	308	643
S3	534	449	393	301	362	330	346	315	384	302	302	288
S4	1366	1244	855	655	468	562	337	653	711	543	619	479
S5	1253	2367	796	636	684	740	940	1630	806	1514	3110	2896
S6	870	900	607	533	582	513	1194	807	426	752	556	679
S7	1066	1176	935	350	767	756	1292	943	1741	893	1207	559
S8	740	1838	1635	432	512	358	596	842	592	546	548	256
S9	999	779	574	639	401	371	464	297	573	531	354	344
S10	261	618	200	289	423	337	484	439	373	425	552	1032
S11	414	1106	626	324	352	385	432	313	281	501	336	734
S12	519	1286	620	518	364	285	634	621	499	746	390	374
S13	594	904	716	1240	810	514	886	931	1586	1410	995	1081
S14	968	940	427	802	774	577	566	815	570	592	505	730
S15	1206	2456	1531	994	1356	913	1498	1497	726	1074	933	1137
S16	774	369	480	561	504	456	612	809	444	621	389	581
S17	1158	2113	982	642	1029	685	1201	1181	717	805	675	794
S18	656	357	460	449	391	380	354	470	509	352	349	867
S19	509	1351	1356	519	531	630	363	491	407	595	521	405
S20	547	449	618	507	521	265	883	515	657	781	492	315
S21	730	799	812	544	488	554	821	1354	1371	683	641	617
S22	627	509	405	392	325	377	580	629	336	370	461	357
S23	636	2547	558	406	367	343	644	453	799	760	3101	1312
S24	809	1107	657	615	613	626	694	1127	377	640	754	834
S25	892	1263	831	944	461	442	342	1086	412	577	920	550
S26	794	1014	346	761	449	205	582	780	596	724	1155	600
S27	984	1089	711	631	844	708	503	523	491	582	821	370
S28	942	989	775	527	492	353	470	892	542	535	556	475
S29	662	1155	603	387	588	391	646	400	809	474	731	349
S30	1243	1132	1007	496	312	1354	613	480	843	651	726	931
S31	380	335	441	473	391	503	514	399	449	508	467	445
S32	438	657	357	318	381	292	492	327	309	810	272	306
S33	651	862	466	431	459	390	485	396	363	404	418	412
S34	607	2105	526	423	385	381	473	456	447	446	1047	551
S35	923	619	655	633	559	576	521	483	337	473	548	435
S36	465	1640	882	426	391	561	791	1002	895	1114	608	881
